# Supplementary material for: Arthropod entombment in weathering-formed opal: new horizons for recording life in rocks
Source: Springer Nature journal article supplement (doi:10.1038/s41598-020-67412-9), 2020-06-29

**Arthropod entombment in precious opal: new horizons for recording life in  
rocks**

**SUPPLEMENTARY MATERIALS**

Chauviré Boris\*

*Univ. Grenoble Alpes, Univ. Savoie Mont Blanc, CNRS, IRD, IFSTTAR, ISTERre, 38000 Grenoble, France*

Houadria Mickal

*Institute of Entomology, Biology Centre of Academy of Sciences, Branisovska 31,c, Czech Republic*

Donini Aline

*Actias, 44260 Savenay, France*

Berger Brian T.

*@VelvetBoxSociety, Timberbrook Capital, Philadelphia PA, USA*

Rondeau Benjamin

*Université de Nantes, Laboratoire de Planétologie et Géodynamique, CNRS UMR 6112, BP 92208, 44322*

*Nantes, France*

Kritsky Gene

*School of Behavioral and Natural Sciences, Mount St. Joseph University, Cincinnati, Ohio, USA*

Lhuissier Pierre

*Univ. Grenoble Alpes, CNRS, Grenoble INP, SIMAP, F-38000 Grenoble, France*

Movie S1: Animated images of global fossil with colored parts.

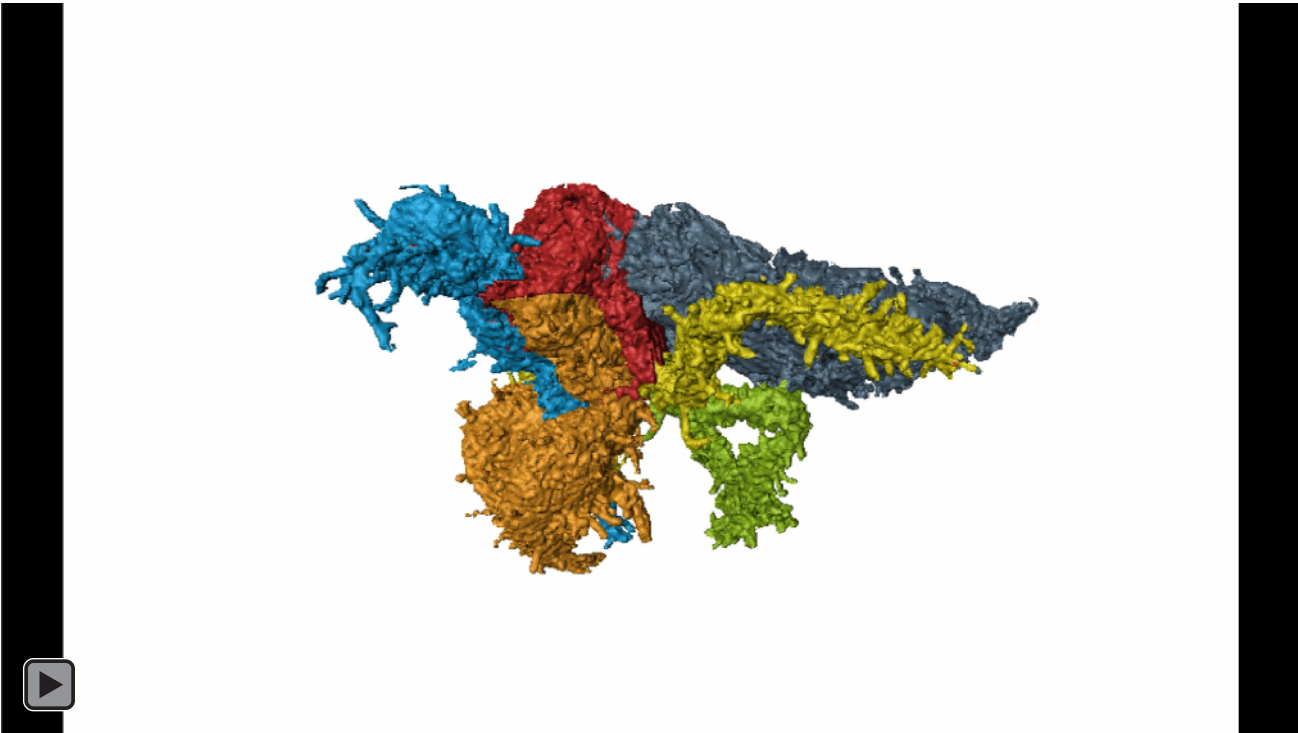

Movie S2: Animated images of forelegs and rostrum.

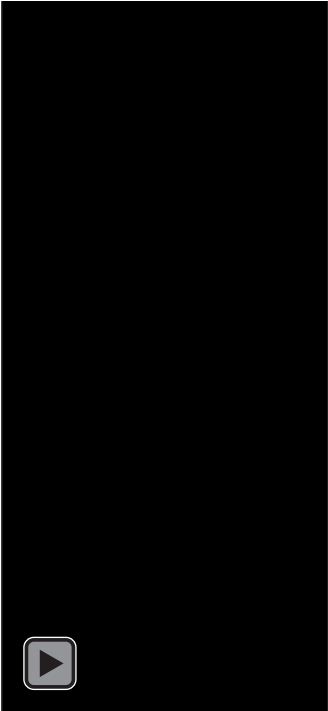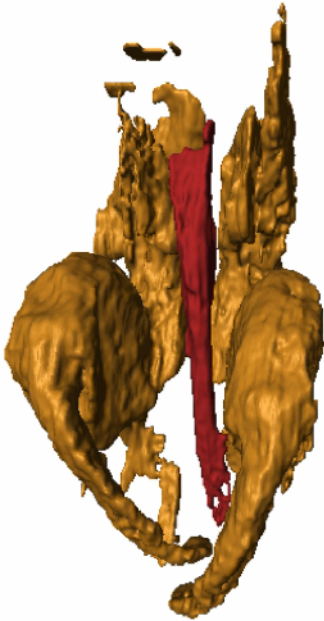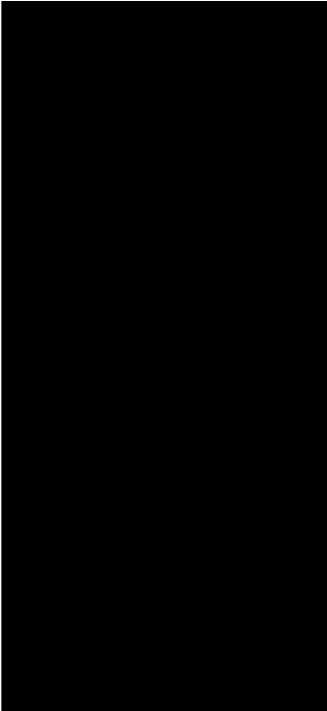

Movie S3: Animated images of the right forelegs.

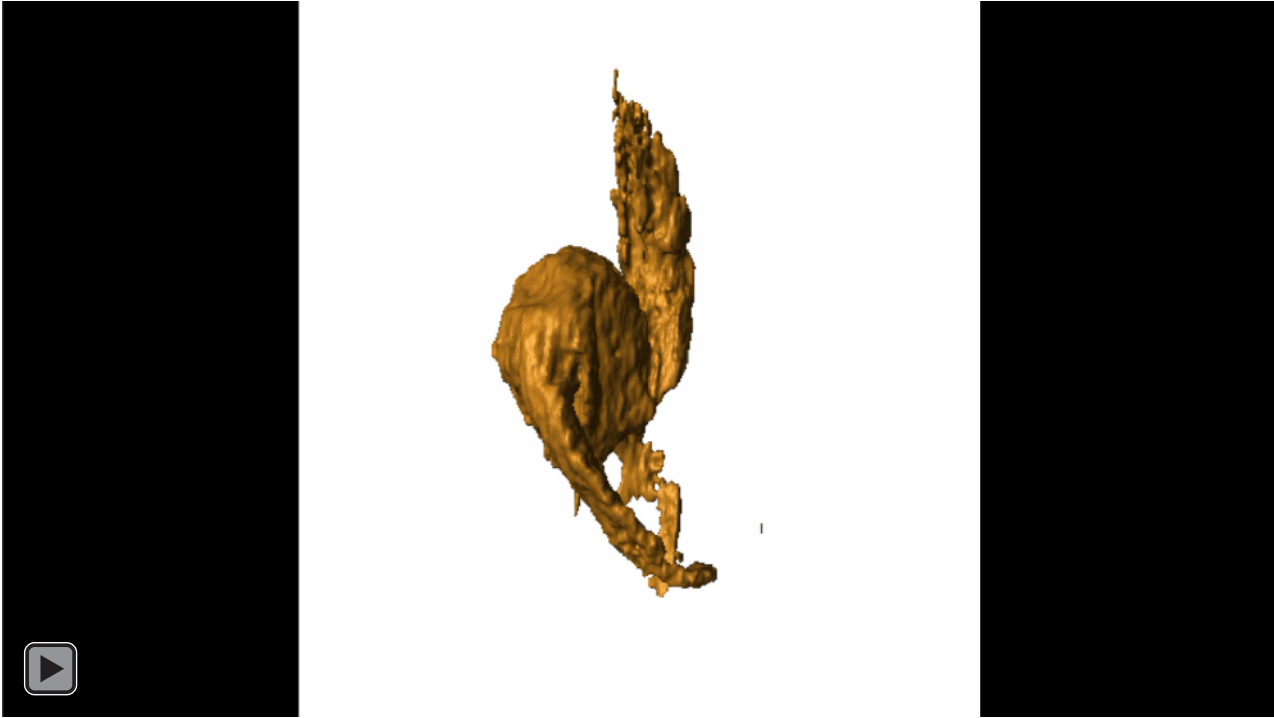

Supplement: 41598_2020_67412_MOESM1_ESM.pdf [file 41598_2020_67412_MOESM1_ESM.pdf]
